# Supplementary material
Source: PubMed Central journal article supplement (PMC11030983)
Supplement: 262_2009_719_MOESM1_ESM.pdf [file 262_2009_719_MOESM1_ESM.pdf]

## Appendix

### Supplemental Table 1

| Gene    | NCBI         | Upper (5' - 3')                 | Lower (5' - 3')               | Position  | Amplicon | Annealing Temp (°C) |
|---------|--------------|---------------------------------|-------------------------------|-----------|----------|---------------------|
| ARG1    | NM_007482    | AAC ACG GCA GTG GCT TTA ACC     | GGT TTT CAT CTG GCG CAT TC    | 958-1075  | 118      | 59                  |
| CCL2    | NM_011333    | GCA TCA CAG TCC GAG TCA C       | TTC CACAAC CAC CTC AAG C      | 478-552   | 75       | 58                  |
| CCL5    | NM_013653    | CAC TCC CTG CTG CTT TGC         | CAC TTG GCG GTT CCT TCG       | 128-254   | 127      | 62                  |
| COX2    | NM_011198    | ACC AGC AGT TCC AGT ATC AG      | AGG AGG ATG GAG TTG TTG TAG   | 1160-1302 | 143      | 62                  |
| CXCL12  | NM_001012477 | AAG ATG TGA GAG GTG TGA GTC     | GCA GAG GAA GTG GCT ATG G     | 2864-2961 | 98       | 65                  |
| ESRA    | NM_007956    | ATT GAC CAA CCT AGC AGA TAG     | CCA GAC GAG ACC AAT CAT C     | 2996-3158 | 163      | 64                  |
| ESRB    | NM_207707    | TGC TGG AGA TGCTGA ATG          | CTG TGA CTG GAG GTT CTG       | 1928-2049 | 122      | 58                  |
| Flt3L   | NM_013520    | GCT GTT GCT GCT GCT GAG         | CTT TGA AGT TGG AGG AGA TGG G | 303-385   | 83       | 63                  |
| FOXP3   | NM_054039    | CCC AGG AAA GAC AGC AAC CTT     | TTC TCA CAA CCA GGC CAC TTG   | 783-872   | 90       | 62                  |
| GAPDH   | NM_008084    | CCA CTC ACG GCA AAT TCA AC      | GTA GAC TCC ACG ACA TAC TCA G | 195-340   | 146      | **                  |
| GCSF    | NM_009971    | GCT GCT GCT GTG GCA AAG T       | AGC CTG ACA GTG ACC AGG       | 114-181   | 68       | 65                  |
| GMCSF   | NM_009969    | TGG GCA TTG TGG TCT ACA GC      | AAG GCC GGG TGA CAG TGA T     | 315-377   | 63       | 68                  |
| IDO     | NM_008324    | GCC CTC AAA TGT GGA AAG C       | CTG TGC CCT GAT AGA AGT GG    | 1192-1325 | 134      | 65                  |
| IFNg    | NM_008337    | TCA AGT GGC ATA GAT GTG GAA GAA | TGG CTC TGC AGG ATT TTC ATG   | 224-315   | 92       | 62                  |
| IL1-B   | NM_008361    | GCA GCA GCA CAT CAA CAA G       | CCG GAA AGA CAC AGG TAG C     | 224-311   | 88       | 65                  |
| IL2     | NM_008366    | ACT GAC ACT TGT GCT CCT TG      | GCT CCT GTA GGT CCA TCA AC    | 125-219   | 95       | 62                  |
| IL4     | NM_021283    | CGA GGT CAC AGG AGA AGG         | TTG GAA GCC CTA CAG ACG       | 200-305   | 106      | 62                  |
| IL10    | NM_010548    | GCA CCC ACT TCC CAG TCG         | GGA GTC GGT TAG CAG TAT GTT G | 164-282   | 119      | 62                  |
| IL12    | NM_008352    | ACA TCA AGA GCA GTA GCA GTT C   | AGT TGG GCA GGT GAC ATC C     | 617-759   | 143      | 62                  |
| IL13    | NM_008355    | GCT TGC CTT GGT GGT CTC         | GTC TGG TCT TGT GTG ATG TTG   | 101-211   | 111      | 62                  |
| IL18    | NM_008360    | CTC TGT GGT TCC ATG CTT TCT G   | TTT GAG GCG GCT TTC TTT GTC   | 26-131    | 106      | 62                  |
| IL24    | NM_053095    | GCC TGA GCC TAA TCC TTC TTC     | ACA GTG TTC TTC ACA GTC CAG   | 284-419   | 136      | 62                  |
| NOS2    | NM_010927    | AGC CAA GCC CTC ACC TAC         | CAA TCT CCT ATC CGT CTC       | 2639-2743 | 105      | 62                  |
| TCRzeta | NM_009539    | CGC CTC CTT TTC TCC TCA TC      | TCC ACT TCA TCT TCT GCT TCC   | 847-934   | 88       | 62                  |
| TGFb2   | NM_009367    | AAT GTG CAG GAT AAT TGC TGC     | AAC TCC ATA GAT ATG GGG ATG C | 2151-2284 | 134      | 58                  |
| VEGA    | NM_009595    | TTA CTG CTG TAC CTC CAC C       | ACA GGA CGG CTT GAA GAT G     | 434-622   | 189      | 58                  |
| VEGC    | NM_009506    | CTA CAG ATG TGG GGG TTG CT      | GCT GCC TGA CAC TGT GGT AA    | 618-857   | 240      | 65                  |
| SCF     | NM_013598    | CGC CTG CCG AAA TGT ATG ACG     | GGT TCT CTG GGT TGG GGT TGC   | 2706-2867 | 162      | 64                  |

**Supplemental Table 1** provides the murine primer sequences used in the qRT-PCR. Genes are as identified within the text. The NCBI accession number is provided along with the 5 and 3 prime sequence. The amplicon size is listed as well as the annealing temperature. The housekeeping gene, GAPDH, was used independent of the temperature. The PCR used an initial melting temperature of 95°C for 15 seconds followed by the annealing temperature for 30 seconds and for 30 seconds at 72°. Elongation for forty cycles was used for each primer sequence.

**Supplemental Table 2**

|       | Product                                         | Clone     | Fluorescence       | Company      |
|-------|-------------------------------------------------|-----------|--------------------|--------------|
| CD3   | anti-mouse CD3e                                 | 145-2C11  | Phycoerythrin (PE) | eBioscience  |
| CD4   | anti-mouse CD4 (L3T4)                           | GK1.5     | Biotin/APC*        | eBioscience  |
| CD8   | CD8a (Ly-2)                                     | 53-6.7    | PE, BD Cychrome    | BDpharmingen |
| CD11b | anti-mouse CD11b (integrin alpha M, Mac-1 alpha | M1/70     | Biotin/APC*        | eBioscience  |
| CD11c | anti-mouse CD11c (integrin aX, p150/90)         | N418      | FITC               | eBioscience  |
| CD25  | CD25 (IL-2Ralpha chain, p55)                    | PC61      | FITC               | BDpharmingen |
| CD62L | CD62L (L-selectin, LECAM-1, Ly-22)              | MEL-14    | BD Cychrome        | BDpharmingen |
| CD83  | anti-mouse CD83                                 | Michel-17 | PE                 | eBioscience  |
| NK    | CD49b/Pan-NK cells                              | DX5       | FITC               | BDpharmingen |
| GR1   | Ly-6G and Ly-6C (Gr-1)                          | RB6-8C5   | FITC               | BDpharmingen |
| B220  | CD45R/B220                                      | RA3-6B2   | BD Cychrome        | BDpharmingen |

**Supplemental Table 2** lists the antibodies, clone name, fluorescent label and supplier used in our flow analysis. In addition, allo phycocyanin conjugate (APC)-streptavidin was used with the Biotin labeled antibodies and was purchased from Invitrogen.

### Supplemental Table 3

#### a. Absolute numbers (x10<sup>6</sup> cells)

| Cell type         | Spleen cells   |                 | Ratio |
|-------------------|----------------|-----------------|-------|
|                   | Wild type mice | Tumor bearing   |       |
| Spleen cells      | 65.0 +/- 4.6   | 169.6 +/- 17.7* | 2.6   |
| Lymphocytes       | 49.9 +/- 3.6   | 139.9 +/- 17.7* | 2.8   |
| CD3               | 16.6 +/- 1.4   | 46.9 +/- 8.4*   | 2.8   |
| CD3+CD4+          | 10.3 +/- 1.1   | 25.8 +/- 5.1*   | 2.5   |
| CD4+CD25+         | 0.03 +/- 0.02  | 0.67 +/- 0.11*  | 22.3  |
| CD3+CD8+          | 4.3 +/- 0.5    | 21.1 +/- 3.5*   | 4.9   |
| B220              | 22.6 +/- 2.0   | 55.8 +/- 10.3*  | 2.5   |
| NK                | 1.9 +/- 0.2    | 2.6 +/- 0.5     | 1.4   |
| GR1+CD11b+        | 0.6 +/- 0.1    | 6.7 +/- 2.4*    | 11.2  |
| CD11c+CD11b-      | 1.2 +/- 0.2    | 3.7 +/- 1.1*    | 3.1   |
| CD11c+CD11b+      | 0.7 +/- 0.1    | 8.3 +/- 1.6*    | 11.9  |
| CD11c+CD11b-B220+ | 1.2 +/- 0.2    | 3.6 +/- 1.0*    | 3.0   |

\*p<0.05 vs Wild type

#### b. Frequency (%)

| Cell type         | Spleen cells   |                | Tumor infiltrating<br>NPCs | Ratio  |       |
|-------------------|----------------|----------------|----------------------------|--------|-------|
|                   | Wild type mice | Tumor bearing  |                            | vs w/t | vs TB |
| Lymphocytes       | 76.6 +/- 1.0   | 81.4 +/- 4.4   | 10.6 +/- 0.2* <sup>#</sup> | 0.14   | 0.13  |
| CD3               | 25.5 +/- 1.1   | 26.7 +/- 2.8   | 1.8 +/- 0.4* <sup>#</sup>  | 0.07   | 0.07  |
| CD3+CD4+          | 16.0 +/- 1.4   | 14.6 +/- 2.2   | 0.4 +/- 0.2* <sup>#</sup>  | 0.03   | 0.03  |
| CD4+CD25+         | 0.05 +/- 0.03  | 0.37 +/- 0.06* | 5.9 +/- 0.1* <sup>#</sup>  | 118.00 | 15.95 |
| CD3+CD8+          | 6.6 +/- 0.5    | 12.1 +/- 0.8*  | 1.0 +/- 0.3* <sup>#</sup>  | 0.15   | 0.08  |
| B220              | 34.6 +/- 1.3   | 37.4 +/- 2.5   | NA                         | NA     | NA    |
| NK                | 3.0 +/- 0.3    | 1.7 +/- 0.4*   | 4.4 +/- 1.1* <sup>#</sup>  | 1.47   | 2.59  |
| GR1+CD11b+        | 0.8 +/- 0.1    | 4.0 +/- 0.7*   | 36.1 +/- 5.9* <sup>#</sup> | 45.13  | 9.03  |
| CD11c+CD11b-      | 1.9 +/- 0.2    | 1.9 +/- 0.3    | 47.5 +/- 3.5* <sup>#</sup> | 25.00  | 25.00 |
| CD11c+CD11b+      | 1.1 +/- 0.1    | 4.4 +/- 0.4*   | 3.2 +/- 0.6*               | 2.91   | 0.73  |
| CD11c+CD11b-B220+ | 1.8 +/- 0.2    | 1.8 +/- 0.3    | 45.9 +/- 3.5* <sup>#</sup> | 25.50  | 25.50 |

\*p<0.05 vs Wild type, <sup>#</sup>p<0.05 vs Tumor bearing

**Supplemental Table 3** Absolute number of spleen cells and frequency of cellular phenotypes within the spleen and the non-parenchymal cells (NPC) of the tumors in w/t (FVB) and FVB-neuT tumor bearing mice. **a:** The absolute numbers of each cellular phenotype x 10<sup>6</sup> is identified as well as the fold increase in the tumor bearing mice. **b:** The frequency of spleen cells, in w/t mice and tumor bearing mice as well as the tumor infiltrating NPCs are identified. The last two columns are the fold change of the NPCs as compared to w/t or tumor bearing spleen cells. In both tables, SPSS was used with the student T test to

assess a significant difference. A p value  $\leq 0.05$  was identified as significantly different. A superscript asterisk (\*) represents a significant difference compared to w/t, while (#) identified a significant difference compared to spleen cells from tumor bearing mice.
